# Supplementary material for: Changes in Tyrosine Hydroxylase Activity and Dopamine Synthesis in the Nigrostriatal System of Mice in an Acute Model of Parkinson’s Disease as a Manifestation of Neurodegeneration and Neuroplasticity
Source: MDPI journal article supplement (doi:10.3390/brainsci12060779), 2022-06-14
Supplement: s1 [file s1]

1

# Substantia Nigra

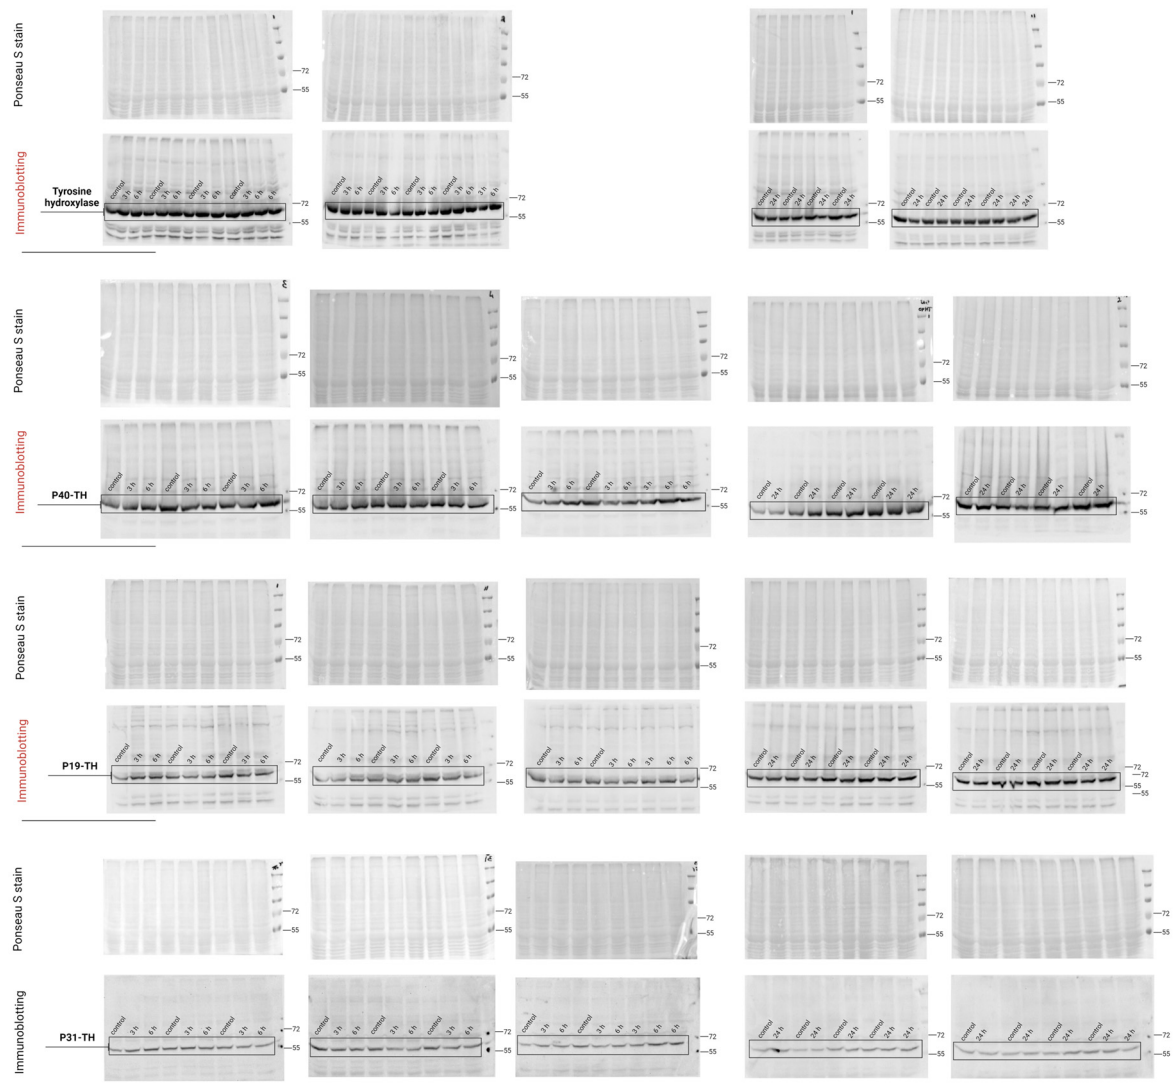

**Figure S2.** Western blot representation of TH, P31-TH, P40-TH and P19-TH immunoreactivity and Ponceau staining in the SN of the control and 3, 6, 24 h after 4 × 12 mg/kg of MPTP.
